# Supplementary material for: Aptian–Albian clumped isotopes from northwest China: cool temperatures, variable atmospheric p CO 2 and regional shifts in the hydrologic cycle
Source: Copernicus journal article supplement (doi:10.5194/cp-17-1607-2021), 2021-08-03
Supplement: Supplementary file 5 [file cp-17-1607-2021-supplement.zip]

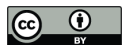

## *Supplement of*

# **Aptian–Albian clumped isotopes from northwest China: cool temperatures, variable atmospheric $p\text{CO}_2$ and regional shifts in the hydrologic cycle**

**Dustin T. Harper et al.**

*Correspondence to:* Dustin T. Harper (dtharper@ku.edu)

- cp-17-1607-2021-supplement-title-page.pdf
- CUBESSIL\_clumped\_data\_processing\_p1b.pdf
- CUBESSIL\_clumped\_data\_processing\_p2.pdf
- FS1.Lithostrat.pdf
- Harperetal\_Tables\_210520.xlsx
- \_\_MACOSX
  - .\_CUBESSIL\_clumped\_data\_processing\_p1b.pdf
  - .\_CUBESSIL\_clumped\_data\_processing\_p2.pdf
  - .\_FS1.Lithostrat.pdf
  - .\_Harperetal\_Tables\_210520.xlsx

The copyright of individual parts of the supplement might differ from the article licence.
