# Supplementary material for: Aptian–Albian clumped isotopes from northwest China: cool temperatures, variable atmospheric p CO 2 and regional shifts in the hydrologic cycle
Source: Copernicus journal article supplement (doi:10.5194/cp-17-1607-2021), 2021-08-03
Supplement: Supplementary file 6 [file cp-17-1607-2021-supplement.zip]

(a)

WP2011-Sec3A

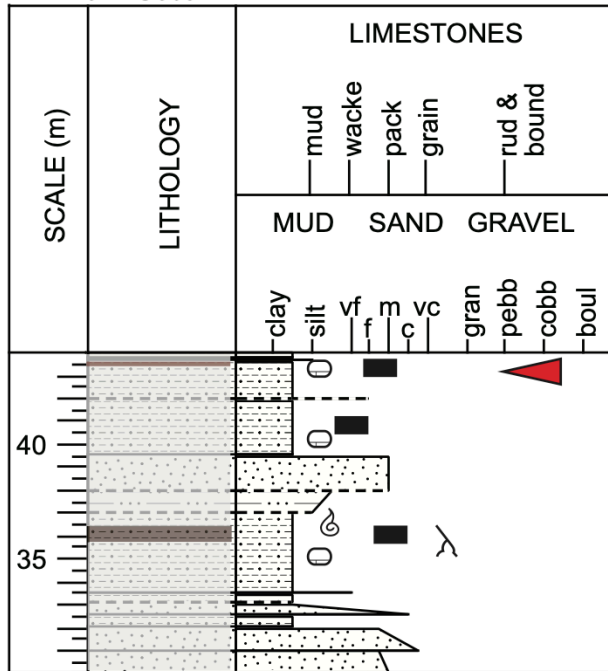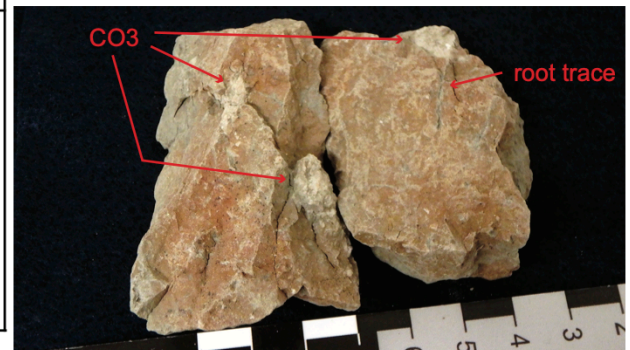

WP2011-Sec3

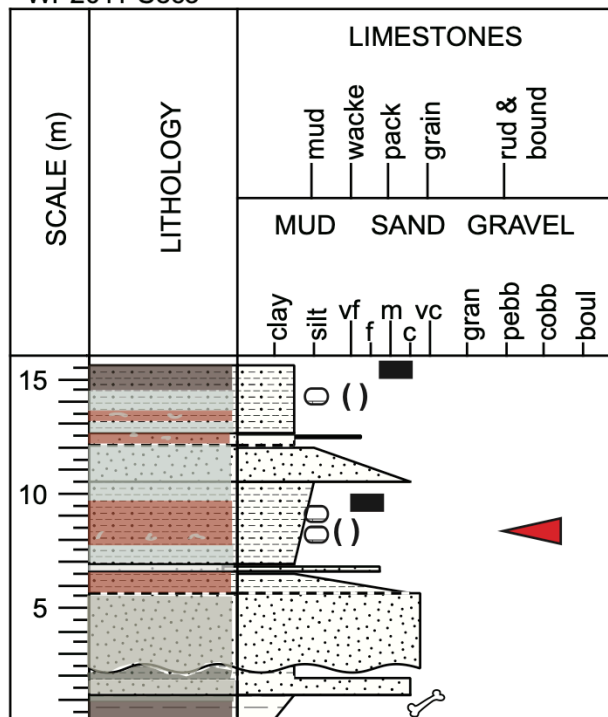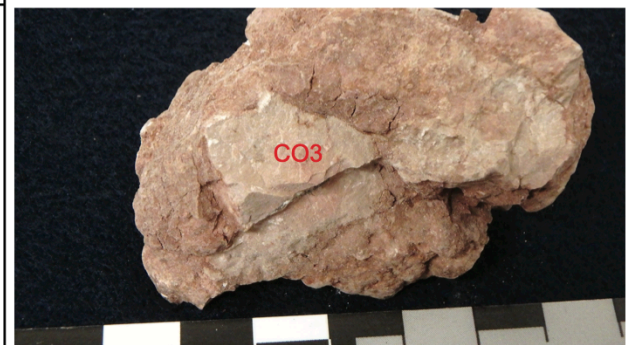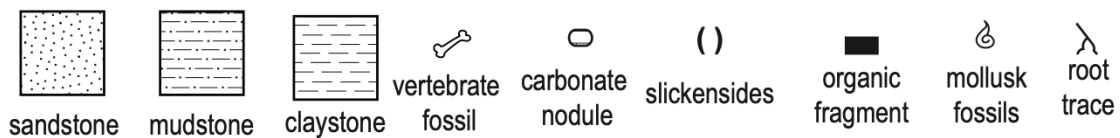

(b)

WP2011-Sec3B-C

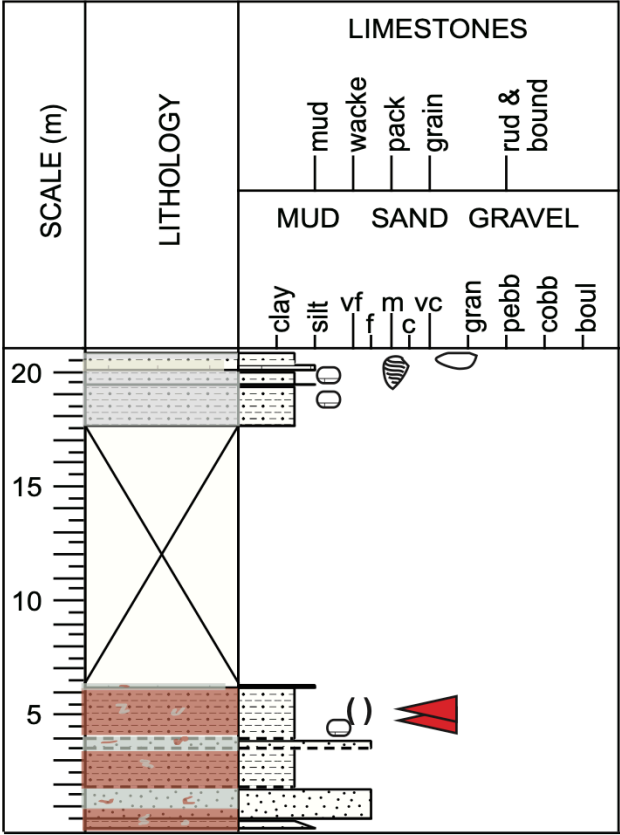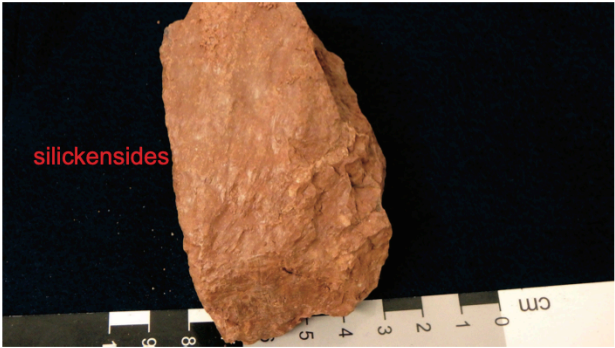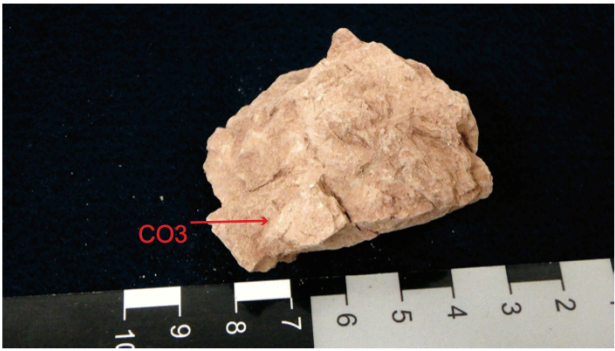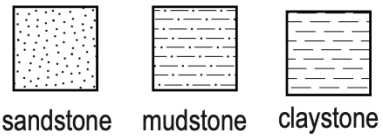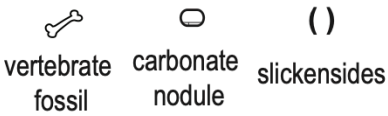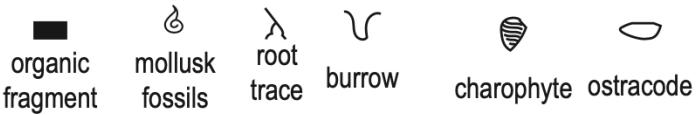

(c)

WP2011-Sec3H

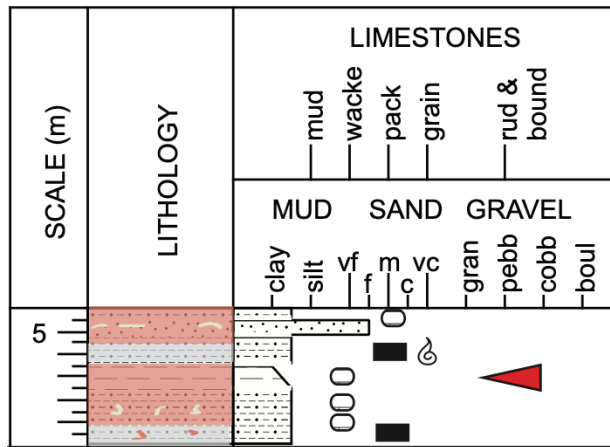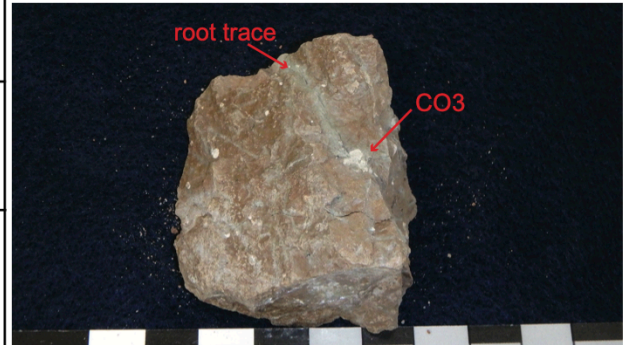

WP2011-Sec3F

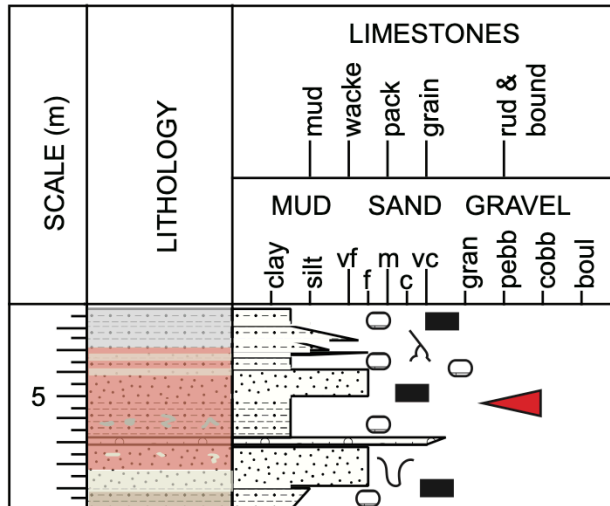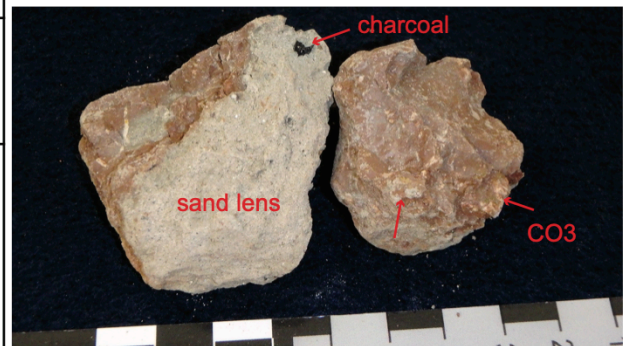

WP2011-Sec3E

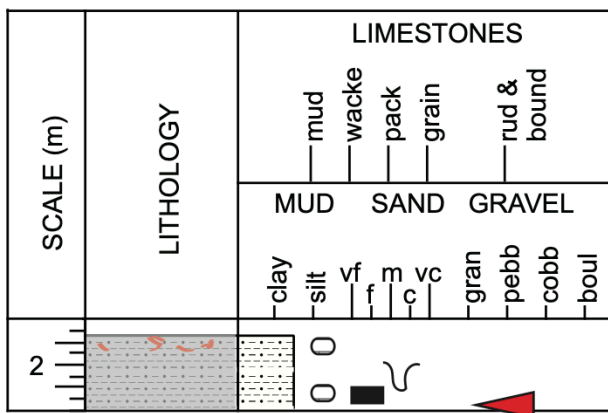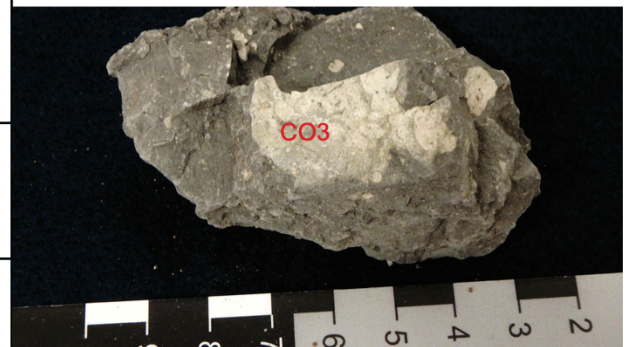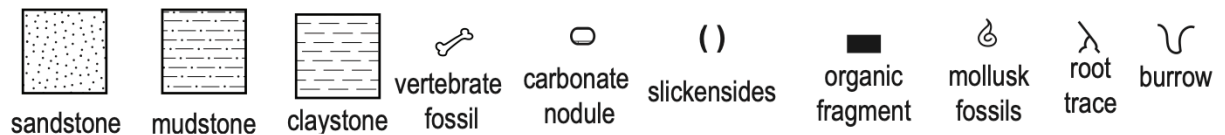



(d)

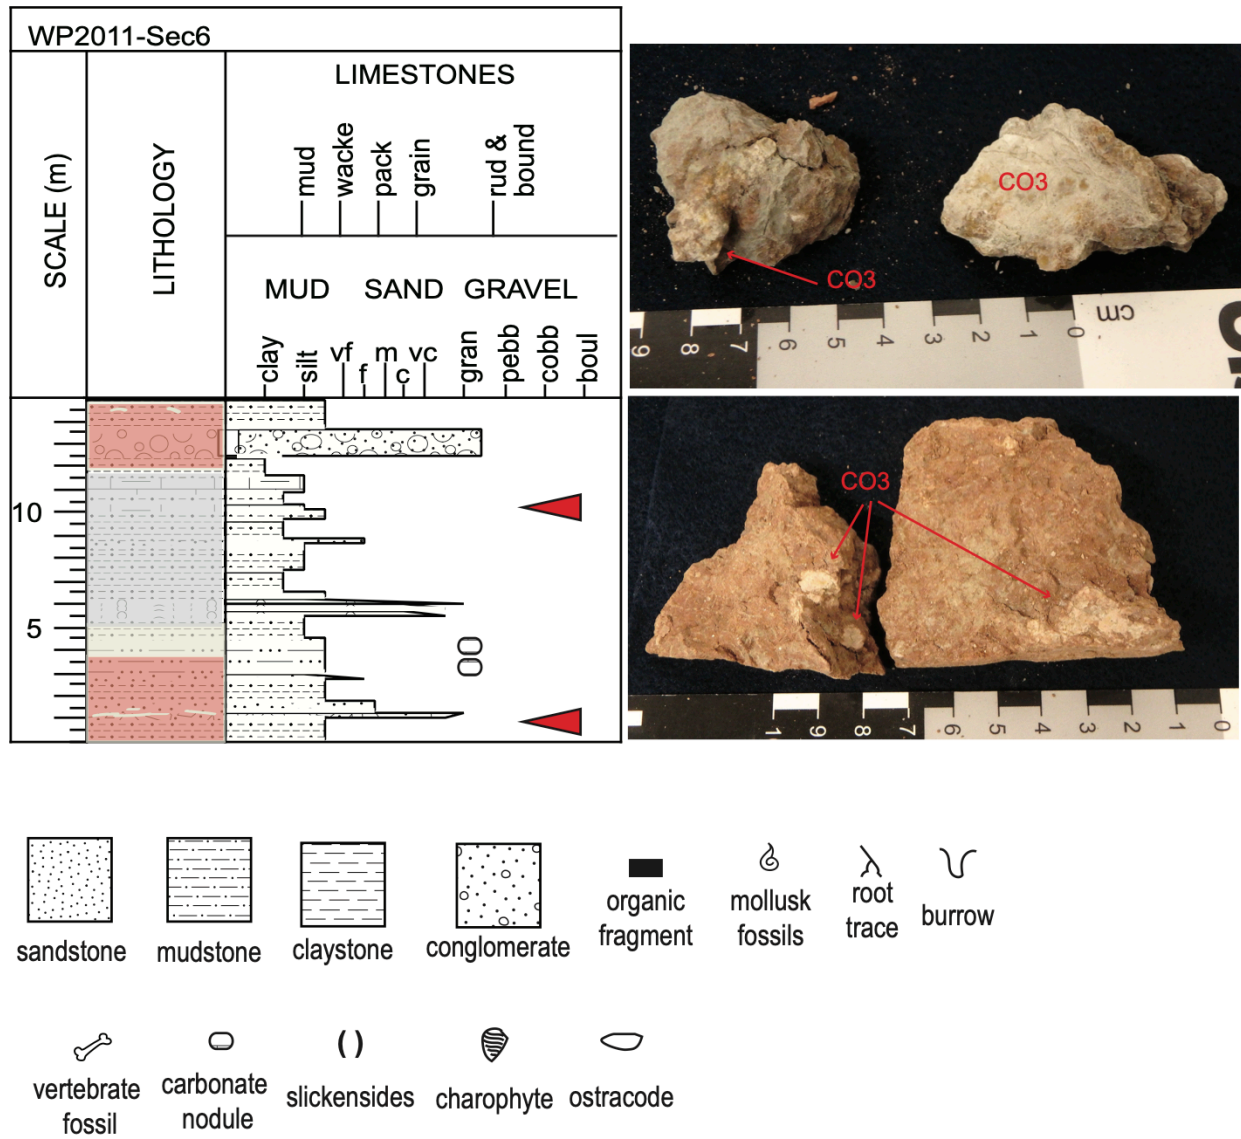

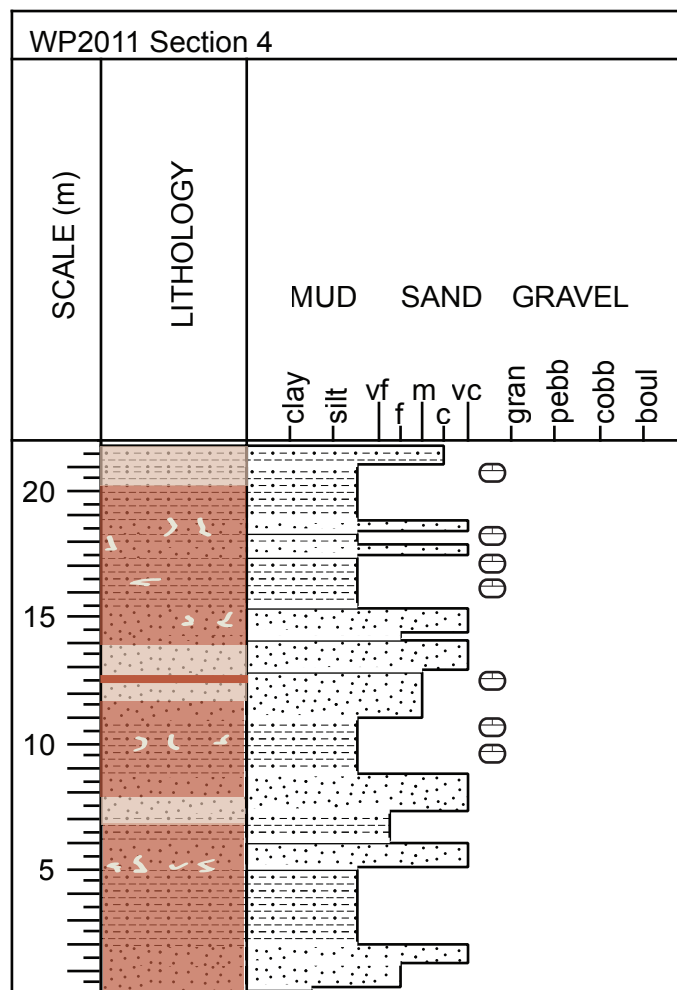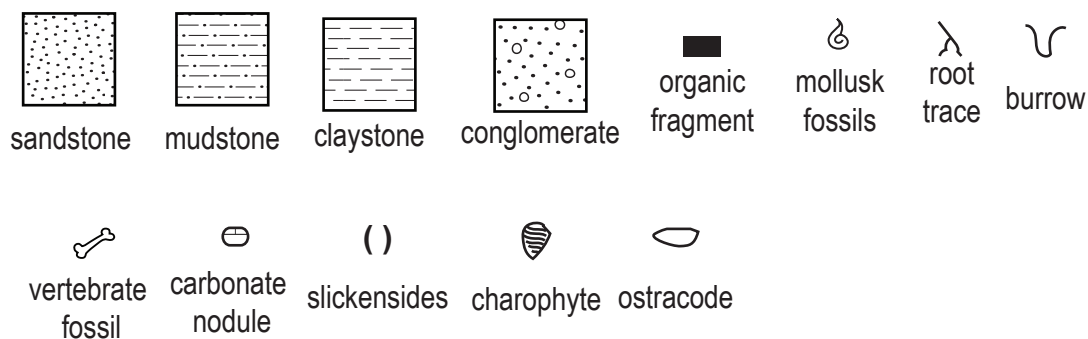

**Supplementary Figure S1. Annotated stratigraphic columns showing lithostratigraphy, sedimentary structures, and images of select hand samples from sections 3 and 3A (panel a), 3B-C (panel b), 3E-F and 3H (panel c), 6 (panel d) and 4 (panel e) at the White Pagoda Site.**
